# Supplementary material for: Discovery of AI-2 Quorum Sensing Inhibitors Targeting the LsrK/HPr Protein–Protein Interaction Site by Molecular Dynamics Simulation, Virtual Screening, and Bioassay Evaluation
Source: MDPI journal article supplement (doi:10.3390/ph16050737), 2023-05-12
Supplement: s1 [file s1]

**Table S1.** Interactions between LsrK and HPr.

| HPr Residues | LsrK Residues | Distance (Å) | Specific Interactions                         | Hydrogen Bond (HB) | Salt Bridge |
|--------------|---------------|--------------|-----------------------------------------------|--------------------|-------------|
| Hip 15       | Glu 122       | 2.3          | 1× HB to Glu 122                              | 1                  | 0           |
| Hip 15       | Arg 118       | 2.6          |                                               | 0                  | 0           |
| Hip 15       | Glu 125       | 3.3          |                                               | 0                  | 0           |
| Thr 16       | Leu 126       | 3            |                                               | 0                  | 0           |
| Thr 16       | Glu 122       | 2.1          | 1× HB to Glu 122                              | 1                  | 0           |
| Thr 16       | Leu 152       | 3            |                                               | 0                  | 0           |
| Thr 16       | Hip 156       | 2.8          |                                               | 0                  | 0           |
| Arg 17       | Glu 125       | 2.5          |                                               | 0                  | 0           |
| Arg 17       | Leu 126       | 3.5          |                                               | 0                  | 0           |
| Arg 17       | Asn 129       | 3.7          |                                               | 0                  | 0           |
| Ala 20       | Leu 126       | 2.4          |                                               | 0                  | 0           |
| Lys 27       | Asp 209       | 3.4          |                                               | 0                  | 0           |
| Lys 27       | Ala 206       | 4            |                                               | 0                  | 0           |
| Lys 27       | Met 210       | 3.8          |                                               | 0                  | 0           |
| Lys 40       | Arg 163       | 2.6          |                                               | 0                  | 0           |
| Lys 40       | Asp 160       | 2.3          | 1× HB to Asp 160<br>1× salt bridge to Asp 160 | 1                  | 1           |
| Ser 41       | Arg 163       | 2.5          |                                               | 0                  | 0           |
| Ala 42       | Arg 163       | 3.5          |                                               | 0                  | 0           |
| Lys 45       | Asp 209       | 3.8          |                                               | 0                  | 0           |
| Ser 46       | Met 210       | 2.5          |                                               | 0                  | 0           |
| Ser 46       | Asp 209       | 2.4          | 1× HB to Asp 209                              | 1                  | 0           |
| Ser 46       | Gly 212       | 2.6          |                                               | 0                  | 0           |
| Ser 46       | Ala 211       | 3.2          |                                               | 0                  | 0           |
| Leu 47       | Met 210       | 2.4          |                                               | 0                  | 0           |
| Leu 47       | Leu 126       | 2.3          |                                               | 0                  | 0           |
| Leu 47       | Leu 152       | 3.5          |                                               | 0                  | 0           |
| Leu 47       | Leu 123       | 3.7          |                                               | 0                  | 0           |
| Phe 48       | Met 210       | 2.1          | 1× HB to Met 210                              | 1                  | 0           |
| Phe 48       | Leu 152       | 2.7          |                                               | 0                  | 0           |
| Phe 48       | Tyr 162       | 2.4          |                                               | 0                  | 0           |
| Phe 48       | Ala 155       | 2.4          |                                               | 0                  | 0           |
| Phe 48       | Ala 211       | 2.3          |                                               | 0                  | 0           |
| Phe 48       | Leu 151       | 2.2          |                                               | 0                  | 0           |
| Phe 48       | Leu 123       | 2.2          |                                               | 0                  | 0           |
| Phe 48       | Ile 148       | 2.2          |                                               | 0                  | 0           |
| Phe 48       | Leu 126       | 3.9          |                                               | 0                  | 0           |
| Lys 49       | Tyr 162       | 2.1          | 1× HB to Tyr 162                              | 1                  | 0           |
| Lys 49       | Gly 212       | 2.2          |                                               | 0                  | 0           |
| Lys 49       | Ala 211       | 3            |                                               | 0                  | 0           |
| Lys 49       | Arg 163       | 2.3          | 1× HB to Arg 163                              | 1                  | 0           |
| Lys 49       | Ala 165       | 1.9          | 1× HB to Ala 165                              | 1                  | 0           |
| Lys 49       | Met 210       | 3.7          |                                               | 0                  | 0           |
| Lys 49       | Leu 213       | 3.2          |                                               | 0                  | 0           |
| Lys 49       | Ser 166       | 3.7          |                                               | 0                  | 0           |
| Lys 49       | Gln 164       | 3.9          |                                               | 0                  | 0           |
| Gln 51       | Ala 155       | 3.2          |                                               | 0                  | 0           |
| Gln 51       | Hip 156       | 2.2          | 1× HB to Hip 156                              | 1                  | 0           |
| Gln 51       | Ser 159       | 3.9          |                                               | 0                  | 0           |
| Gln 51       | Leu 152       | 3.1          |                                               | 0                  | 0           |
| Thr 52       | Ala 155       | 2.2          |                                               | 0                  | 0           |
| Thr 52       | Ser 159       | 2.5          |                                               | 0                  | 0           |
| Thr 52       | Arg 163       | 2.1          | 2× HBs to Arg 163                             | 2                  | 0           |
| Thr 52       | Tyr 162       | 2.3          |                                               | 0                  | 0           |
| Leu 53       | Arg 163       | 2.4          |                                               | 0                  | 0           |

**Table S2.** Information about the 62 compounds obtained by virtual screening. Compounds were tested at 200  $\mu$ M, and are sorted in the table according to their inhibitory effect. Inhibition rate (%) represents the mean  $\pm$  SD from three independent experiments ( $n = 3$ ). The cLogP represents “calculated LogP”.

| Compound ID | XP Gscore | Structure                                                                           | Molecular Weight | cLogP | Inhibition % |
|-------------|-----------|-------------------------------------------------------------------------------------|------------------|-------|--------------|
| 4171-0375   | -7.308    | 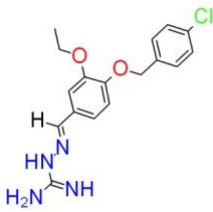   | 346.82           | 4.48  | 98 $\pm$ 7   |
| 4929-0003   | -9.916    |    | 486.57           | 1.94  | 78 $\pm$ 12  |
| K659-0421   | -7.676    |   | 550.57           | 3.95  | 75 $\pm$ 8   |
| 8020-4294   | -8.247    |  | 270.26           | 1.36  | 65 $\pm$ 9   |
| 3229-1889   | -7.641    |  | 469.45           | 4.99  | 63 $\pm$ 4   |
| 8012-5390   | -7.962    |  | 411.87           | 4.69  | 60 $\pm$ 4   |

|           |        |                                                                                     |        |       |         |
|-----------|--------|-------------------------------------------------------------------------------------|--------|-------|---------|
| G268-0878 | -7.665 | 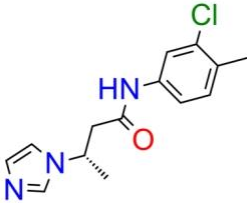   | 277.75 | 1.78  | 58 ± 5  |
| D715-0257 | -8.11  |    | 374.34 | 4.41  | 57 ± 7  |
| 7202-2689 | -7.73  |    | 421.46 | 3.65  | 49 ± 7  |
| 7706-0411 | -7.763 |   | 453.50 | 1.15  | 48 ± 11 |
| 8018-9114 | -7.854 |  | 266.32 | -0.02 | 47 ± 10 |
| Y300-1414 | -7.387 |  | 381.21 | 2.21  | 47 ± 11 |
| K280-0515 | -7.591 |  | 495.96 | 4.12  | 46 ± 7  |
| 4513-1279 | -7.754 |  | 544.69 | 4.66  | 45 ± 6  |

|           |        |                                                                                     |        |      |             |
|-----------|--------|-------------------------------------------------------------------------------------|--------|------|-------------|
| 3843-0108 | -8.244 | 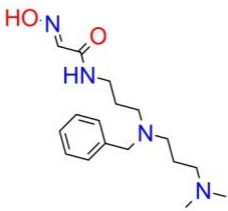   | 320.22 | 1.62 | $42 \pm 8$  |
| 6295-0013 | -7.295 |    | 503.41 | 3.99 | $42 \pm 7$  |
| G377-0098 | -7.712 |    | 328.21 | 3.10 | $40 \pm 11$ |
| 8010-7721 | -7.338 |   | 370.42 | 3.42 | $37 \pm 18$ |
| 8388-1001 | -7.61  |  | 269.75 | 2.64 | $35 \pm 6$  |
| 3346-2730 | -7.481 |  | 346.37 | 2.01 | $35 \pm 17$ |
| D175-0139 | -8.129 |  | 419.84 | 3.02 | $33 \pm 12$ |
| K788-1111 | -7.31  |  | 385.45 | 4.55 | $32 \pm 5$  |

|           |        |                                                                                     |        |      |             |
|-----------|--------|-------------------------------------------------------------------------------------|--------|------|-------------|
| Y020-8649 | -7.878 | 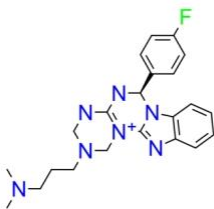   | 408.23 | 4.39 | $30 \pm 6$  |
| 5227-1023 | -7.886 |    | 443.51 | 2.24 | $30 \pm 14$ |
| 1501-0340 | -7.236 |    | 460.75 | 5.31 | $26 \pm 3$  |
| K786-5522 | -7.2   |   | 358.50 | 3.70 | $25 \pm 2$  |
| D072-0818 | -8.371 |  | 422.50 | 2.68 | $24 \pm 8$  |
| C301-9312 | -7.246 |  | 266.30 | 2.41 | $24 \pm 13$ |
| 4191-2801 | -7.18  |  | 444.93 | 3.81 | $24 \pm 5$  |
| 3909-8594 | -7.368 |  | 411.36 | 2.22 | $22 \pm 10$ |

|           |        |                                                                                     |        |      |         |
|-----------|--------|-------------------------------------------------------------------------------------|--------|------|---------|
| 4295-0508 | -7.353 | 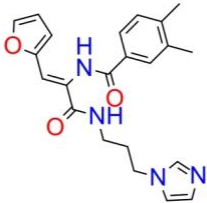   | 392.46 | 0.95 | 18 ± 9  |
| Y041-2219 | -7.383 |    | 457.48 | 0.51 | 18 ± 10 |
| V007-2238 | -7.944 |    | 515.45 | 5.01 | 17 ± 7  |
| 8012-7092 | -7.006 |   | 344.43 | 2.52 | 13 ± 5  |
| K788-1104 | -7.331 |  | 345.51 | 4.55 | 11 ± 3  |
| 8016-3683 | -7.998 |  | 339.30 | 0.98 | 10 ± 2  |
| E600-0605 | -7.029 |  | 325.34 | 3.10 | 10 ± 1  |
| K284-4782 | -7.398 |  | 598.64 | 4.98 | 10 ± 4  |

|           |        |                                                                                     |        |      |           |
|-----------|--------|-------------------------------------------------------------------------------------|--------|------|-----------|
| 7706-0417 | -8.687 | 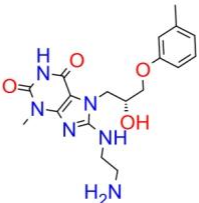   | 388.43 | 1.63 | $9 \pm 7$ |
| 6623-2055 | -8.312 |    | 351.40 | 2.51 | $8 \pm 6$ |
| E957-0696 | -7.93  |    | 445.52 | 3.46 | $7 \pm 4$ |
| C547-0698 | -7.421 |   | 420.51 | 1.96 | $5 \pm 3$ |
| 5585-0279 | -7.738 |  | 426.47 | 1.10 | $4 \pm 1$ |
| 8004-4209 | -7.198 |  | 599.25 | 6.11 | $4 \pm 2$ |
| K227-0045 | -8.05  |  | 359.13 | 2.14 | 0         |
| G935-3933 | -8.122 |  | 528.25 | 0.92 | 0         |

|           |        |                                                                                     |        |      |   |
|-----------|--------|-------------------------------------------------------------------------------------|--------|------|---|
| 3254-1114 | -7.065 | 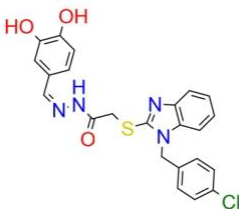   | 466.94 | 5.05 | 0 |
| C312-1678 | -7.583 |    | 475.53 | 3.80 | 0 |
| C328-0147 | -7.959 |    | 500.88 | 3.35 | 0 |
| F594-0352 | -7.496 |   | 444.37 | 3.16 | 0 |
| F919-0042 | -8.472 |  | 489.64 | 2.12 | 0 |
| FF01-5568 | -7.03  |  | 273.30 | 2.53 | 0 |
| G718-1201 | -7.526 |  | 424.88 | 2.93 | 0 |
| G765-0111 | -7.413 |  | 296.37 | 3.01 | 0 |

|           |        |                                                                                     |        |      |   |
|-----------|--------|-------------------------------------------------------------------------------------|--------|------|---|
| G856-4184 | -7.798 | 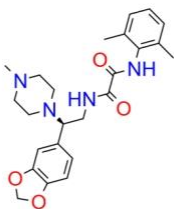   | 438.53 | 2.75 | 0 |
| K292-1641 | -7.534 |    | 543.63 | 2.47 | 0 |
| K784-3476 | -7.517 |    | 369.46 | 4.23 | 0 |
| D337-1446 | -7.511 |   | 371.41 | 2.98 | 0 |
| V006-6582 | -7.132 |  | 607.69 | 7.06 | 0 |
| V014-3026 | -7.254 |  | 555.62 | 6.51 | 0 |
| Y300-1847 | -7.52  |  | 363.45 | 1.13 | 0 |

---

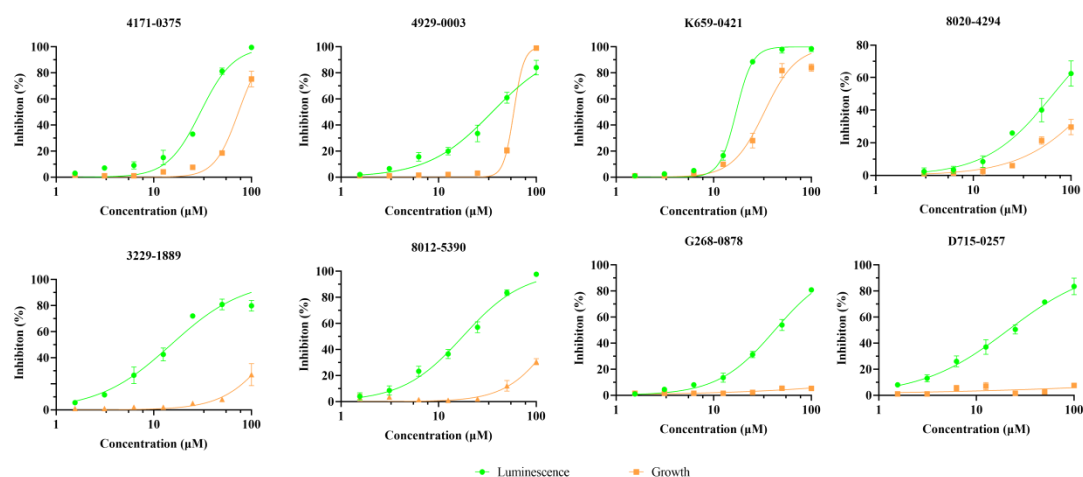

**Figure S1.** Dose–response curves of the eight positive hit compounds in an AI-2 QS interference assay with WHQ02 (*Escherichia coli* BL21  $\Delta$ TolC pWHQ01). Data points represent the mean  $\pm$  SD from three independent experiments ( $n = 3$ ).

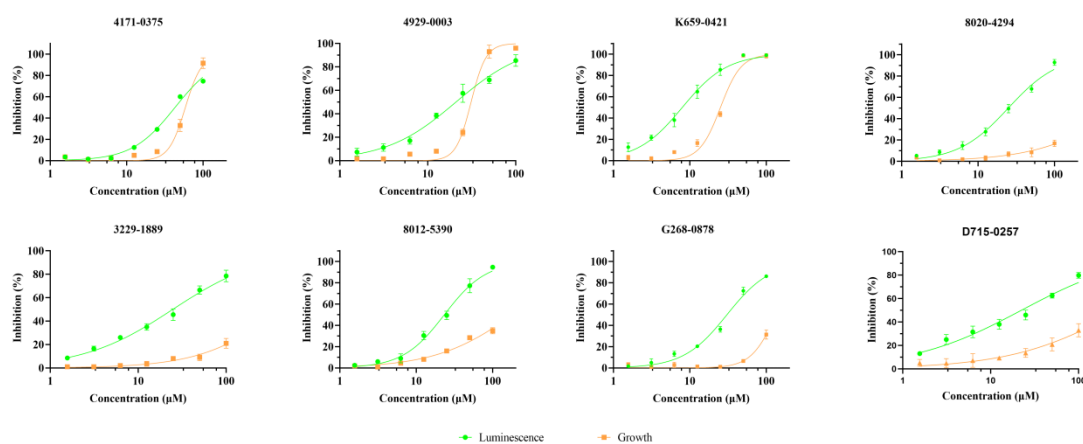

**Figure S2:** Dose–response curves of the eight positive hit compounds in an AI-2 QS interference assay with WHQ01 (*Salmonella typhimurium* ATCC 202165  $\Delta$ TolC pWHQ01). Data points represent the mean  $\pm$  SD from three independent experiments ( $n = 3$ ).
